# Supplementary material for: Polymer electronic composites that heal by solvent vapour
Source: Royal Society of Chemistry journal article supplement (doi:10.1039/c6ra24296k), 2016-01-01
Supplement: c6ra24296k1.pdf [file c6ra24296k1.pdf]

## Supporting information

### Polymer electronic composites that heal by solvent vapour

Paul Baek,<sup>1,2</sup> Nihan Aydemir,<sup>1,2</sup> Omer Javed Chaudhary,<sup>1,2</sup> Eddie Wai Chi Chan,<sup>1,2</sup> Jenny Malmstrom,<sup>2,3</sup> Tim Giffney,<sup>3</sup> Roshan Khadka,<sup>1,2</sup> David Barker,<sup>1</sup> and Jadranka Travas-Sejdic<sup>1,2</sup>

\*

1. Polymer Electronics Research Centre, School of Chemical Sciences, University of Auckland, Auckland, New Zealand

2. The MacDiarmid Institute of Advanced Materials and Nanotechnology, New Zealand

3. Chemical and Materials Engineering, Faculty of Engineering, University of Auckland, Auckland, New Zealand

\*Corresponding Author

**Table S 1.** Molecular weight of the components used in the conducting polymer composite.

| Component | $M_w$ (g/mol) | $M_n$ (g/mol) | PDI |
|-----------|---------------|---------------|-----|
| PDMS-urea | 27900         | 14700         | 1.9 |
| P3HT      | 131000        | 26300         | 5.0 |

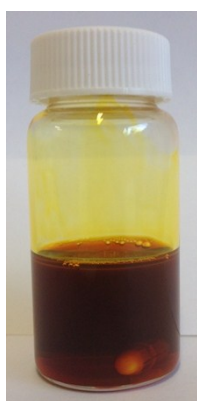

**Figure S 1.** Photograph of 30 wt% P3HT composite in THF (total polymer concentration of 3 wt%).

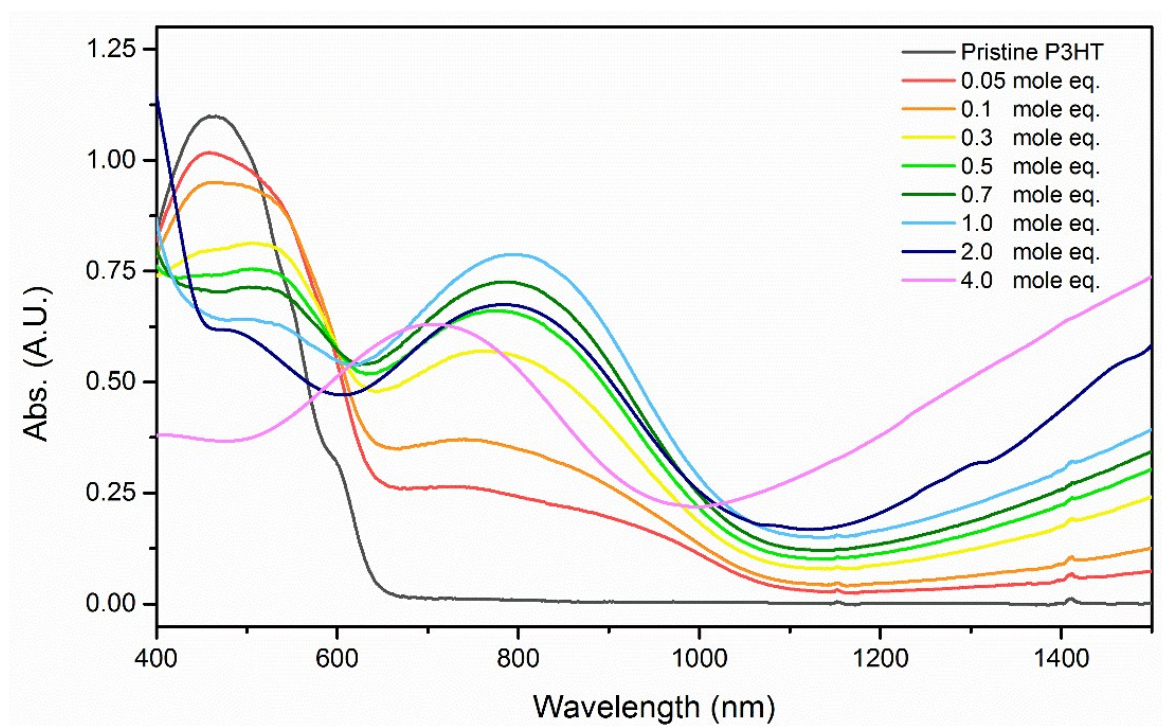

Figure S 2. Solution doping of dilute P3HT solution in chloroform with various mole equivalence of FeCl<sub>3</sub>.

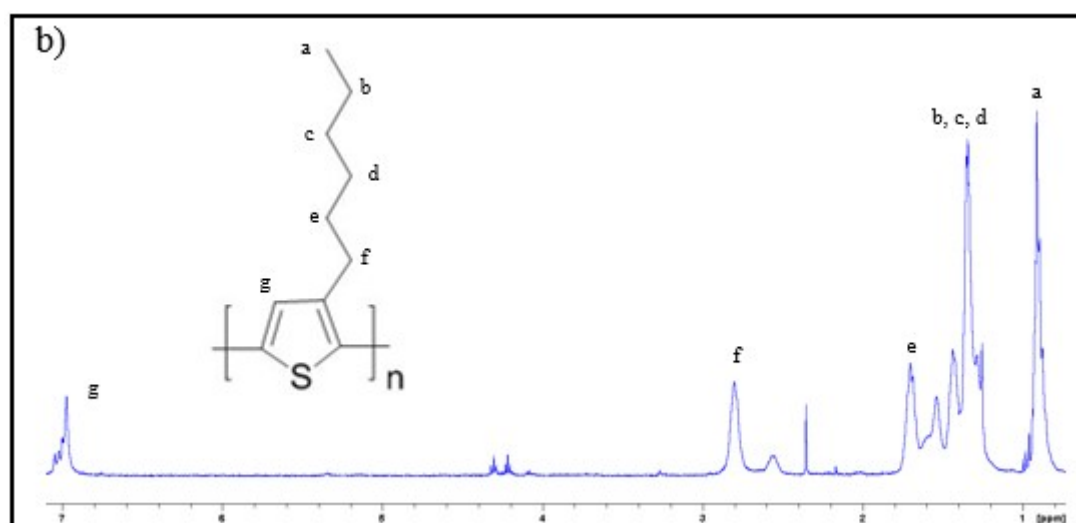

Figure S 3. <sup>1</sup>H NMR of P3HT in CDCl<sub>3</sub>.

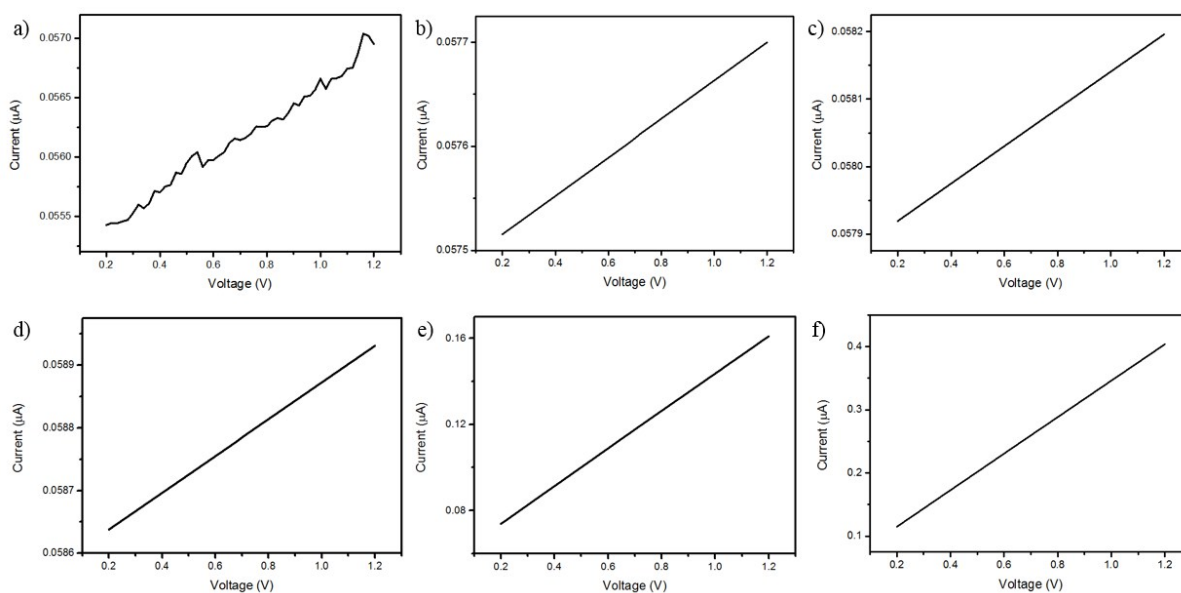

**Figure S 4.** Current-voltage curves for a) 10, b) 30, c) 50, d) 70, e) 90, f) 100 wt% P3HT composite thin films prepared on ITO coated glass. Total polymer concentration of 3 wt% in THF was used to spin coat thin films.

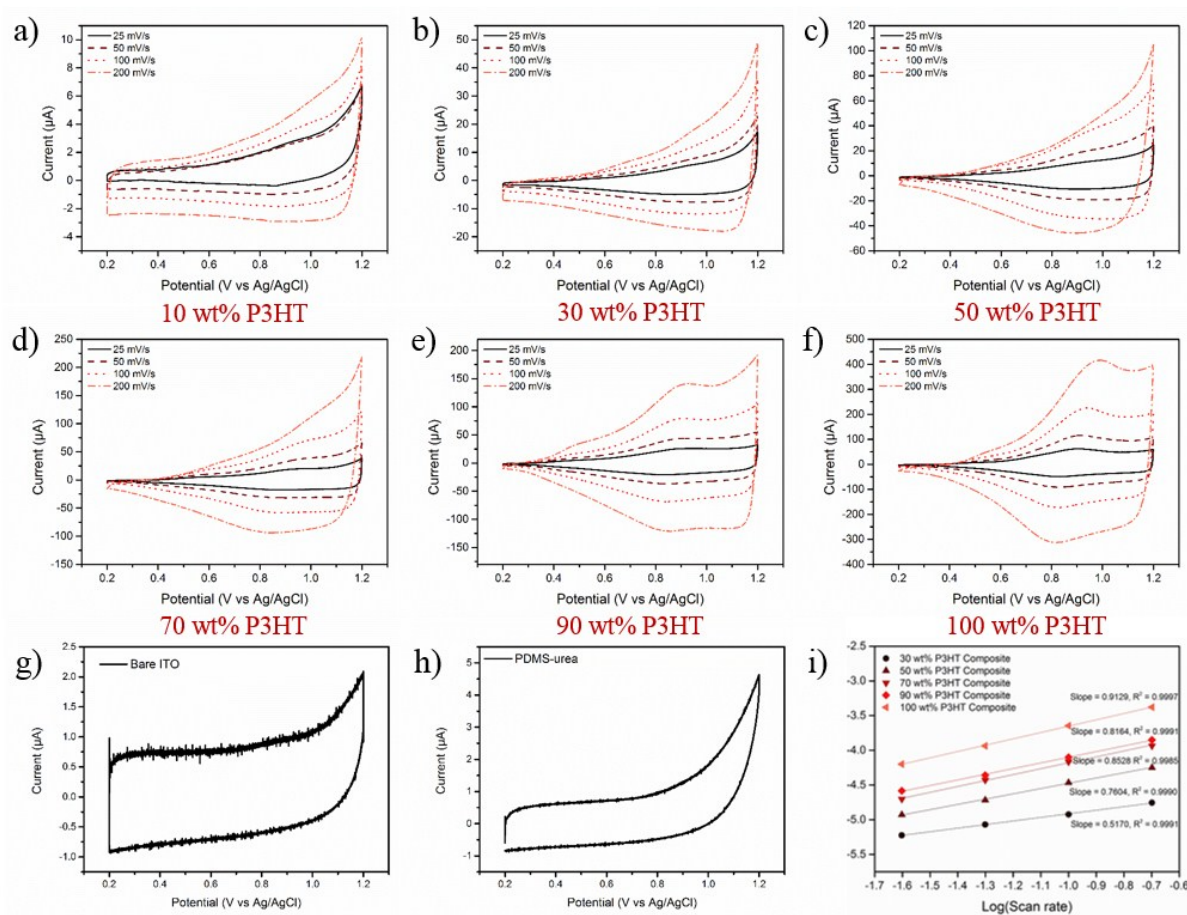

**Figure S 5.** Cyclic voltammograms of a) 10, b) 30, c) 50, d) 70, e) 90, f) 100 wt% P3HT composite thin films prepared on ITO coated glass, g) bare ITO electrode, h) pristine PDMS-urea. Total polymer concentration of 3 wt% in THF was used to spin coat thin films. Applied potential between +0.2 and +1.2 V in 0.1 M TBAHFP in MeCN. i) Linear dependence of log of scan rate over log of current of composite thin films with various weight fractions (30 to 100 wt%) of P3HT.

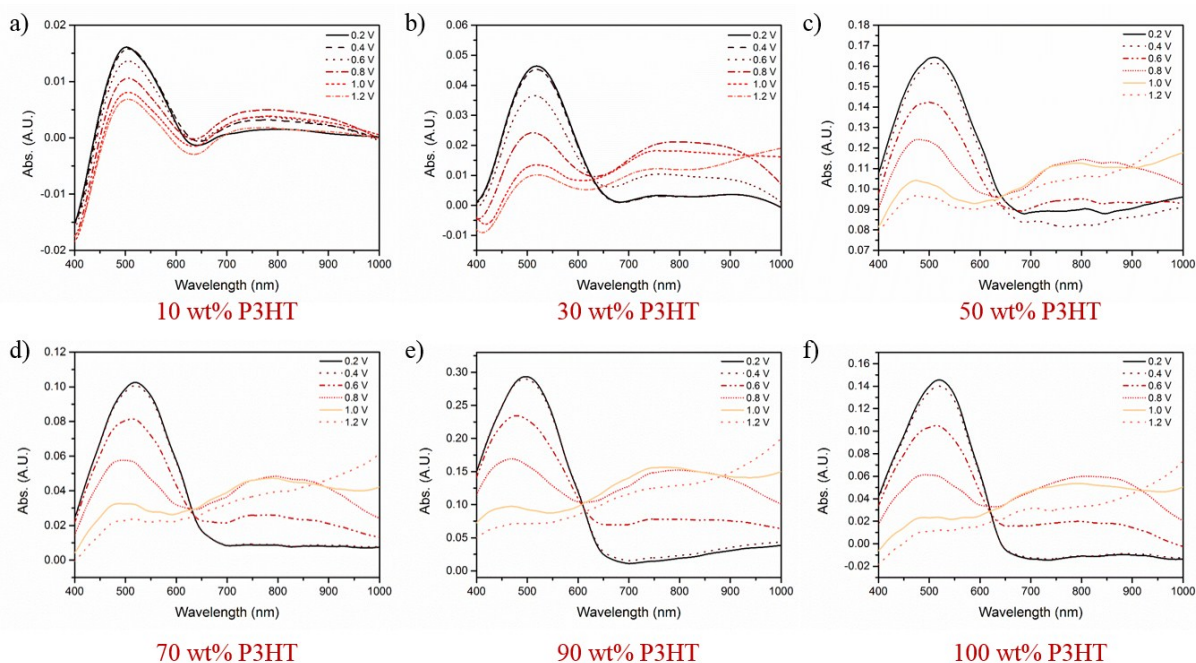

**Figure S 6.** Spectroelectrochemistry of a) 10, b) 30, c) 50, d) 70, e) 90, f) 100 wt% P3HT composite thin films prepared on ITO coated glass. Total polymer concentration of 3 wt% in THF was used to spin coat thin films. The applied potential was between +0.2 and +1.2 V in 0.1 M TBAHFP in MeCN.

### Surface chemistry

In order to find the optimal surface for spin coating of the composite films, various substrates of surface chemistry were analysed by water contact angle measurements (**Figure S6**). The composite thin films showed good adhesion on hydrophobic surfaces, such as of bis(trimethylsilyl)amine silanised glass and indium tin oxide (ITO)-coated glass with an average water contact angle of  $75.9 \pm 1.38^\circ$  and  $82.3 \pm 3.55^\circ$ , respectively (**Table S2**). Thus for conductivity measurements, composite films were deposited between two parallel gold contacts on HMDS-silanised glass substrates, whereas ITO-coated glass was used for electrochemical studies.

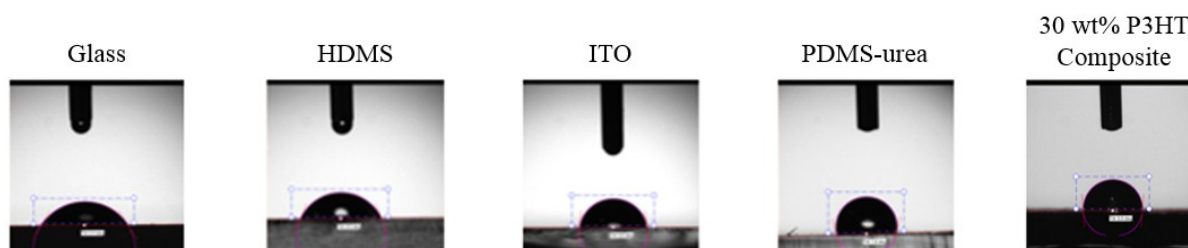

**Figure S 7.** Water contact angle of various substrates, PDMS-urea and the 30 wt% P3HT composite.

**Table S 2.** Contact angle measurements on various substrates.

|                      | <b>Glass</b> | <b>HMDS</b> | <b>ITO</b>  | <b>PDMS-urea</b> | <b>30 wt% P3HT<br/>composite</b> |
|----------------------|--------------|-------------|-------------|------------------|----------------------------------|
| <b>Contact angle</b> | 55.3 ± 2.39  | 75.9 ± 1.38 | 82.3 ± 3.55 | 106 ± 1.01       | 97.5 ± 2.53                      |
